# Supplementary material for: Solid solution ZnW1−xMoxO4 for enhanced photocatalytic H2 evolution
Source: Royal Society of Chemistry journal article supplement (doi:10.1039/d0nj04622a), 2020-01-01
Supplement: d0nj04622a1.pdf [file d0nj04622a1.pdf]

Supporting Information (SI)

---

**Solid Solution  $\text{ZnW}_{1-x}\text{Mo}_x\text{O}_4$  for the Enhanced Photocatalytic  $\text{H}_2$   
Evolution**

Liang Tang<sup>a,b</sup>, Min Zhu<sup>a</sup>, Wenqian Chen<sup>a,c\*</sup>, Suwen Tang<sup>a</sup>, Yuan Feng<sup>a</sup>, Peng Wang

<sup>a</sup>, Xiaonan Liu<sup>a</sup>, Mawlin Foo<sup>d</sup>, Minghong Wu<sup>a,b\*</sup>

<sup>a</sup> School of Environmental and Chemical Engineering, Shanghai University, Shanghai  
200444, PR China

<sup>b</sup> Key Laboratory of Organic Compound Pollution Control Engineering, Ministry of  
Education, Shanghai 200444, PR China

<sup>c</sup> Shanghai Institute of Applied Radiation, Shanghai University, 20 Chengzhong Road,  
Shanghai 201800, PR China

<sup>d</sup> Department of Chemistry, National University of Singapore, 117543, Singapore

\* Corresponding author. E-mail addresses: [wenqianchen@shu.edu.cn](mailto:wenqianchen@shu.edu.cn) (W. Q. Chen),  
[mhwu@shu.edu.cn](mailto:mhwu@shu.edu.cn) (M. H. Wu)

## Supporting Information (SI)

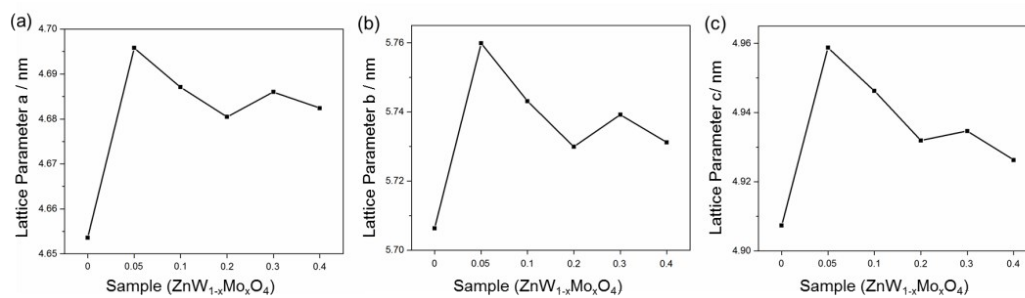

**Fig. S1** Lattice parameter of different  $\text{ZnW}_{1-x}\text{Mo}_x\text{O}_4$  solid solutions.

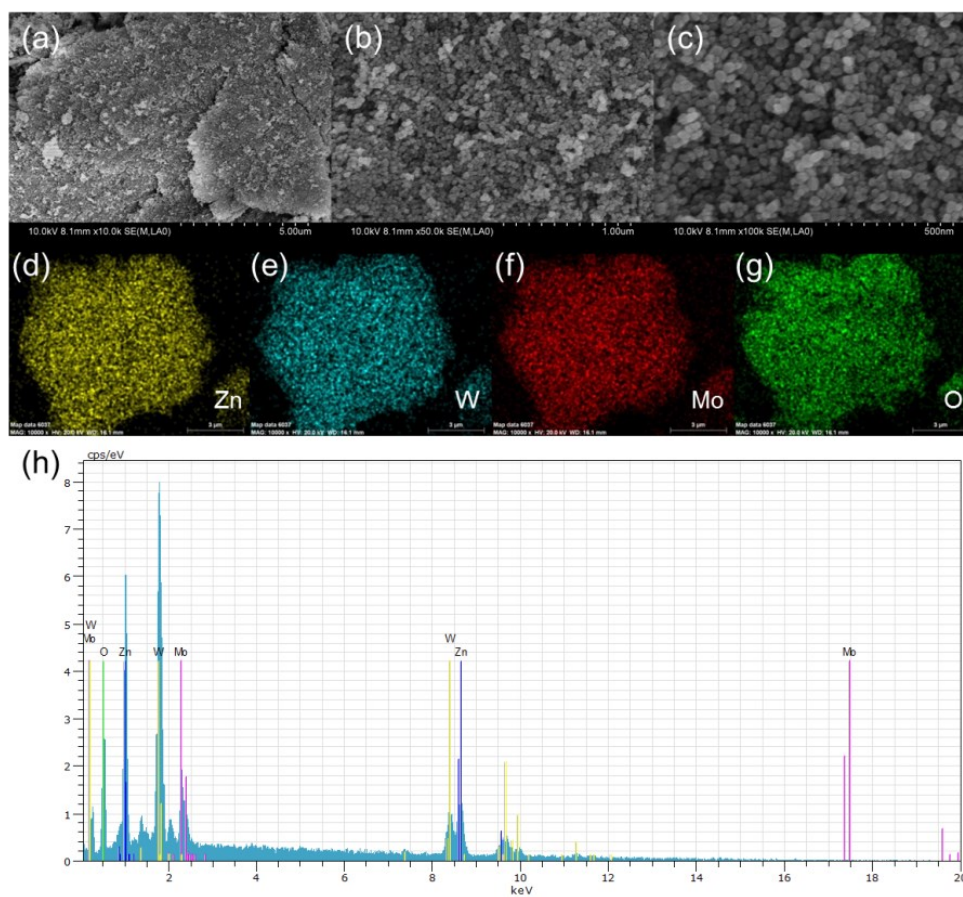

**Fig. S2** SEM images (a, b, c), SEM mapping (d, e, f, g) and SEM-EDS (h) of  $\text{ZnW}_{0.6}\text{Mo}_{0.4}\text{O}_4$ .

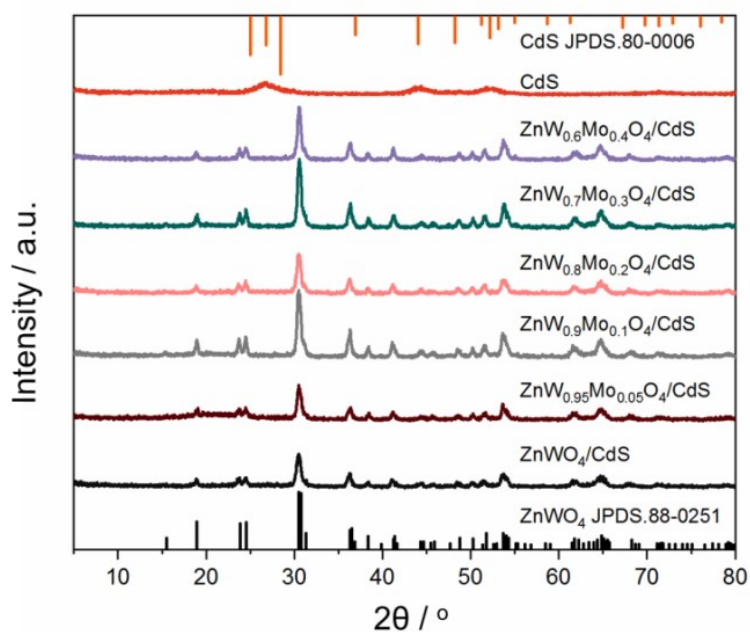

**Fig. S3** XRD patterns of ZnW<sub>1-x</sub>Mo<sub>x</sub>O<sub>4</sub>/CdS heterojunctions with 10 mol% CdS and pure CdS.

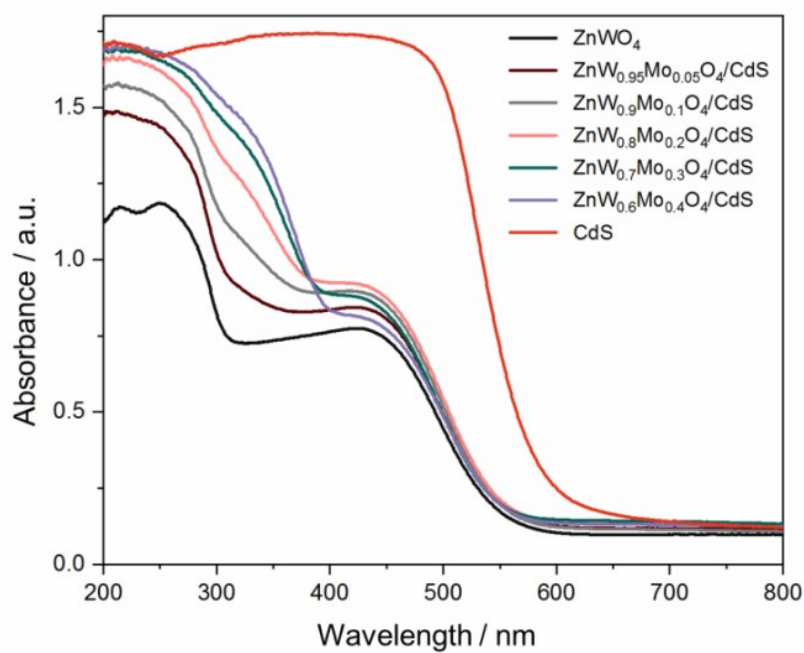

**Fig. S4** UV-vis spectra of ZnW<sub>1-x</sub>Mo<sub>x</sub>O<sub>4</sub>/CdS.

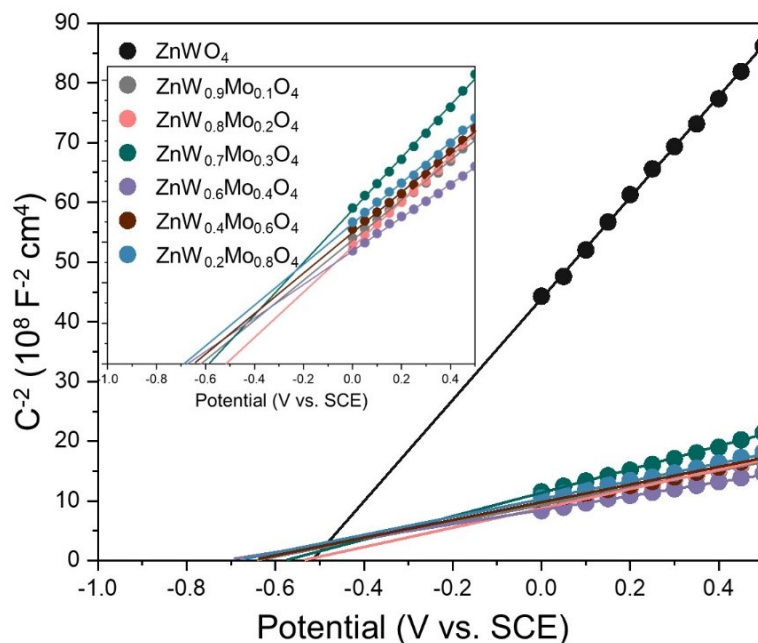

**Fig. S5** Mott-Schottky plots of ZnW<sub>1-x</sub>Mo<sub>x</sub>O<sub>4</sub> with 1000 Hz frequencies in a 0.5M Na<sub>2</sub>SO<sub>4</sub> solution.

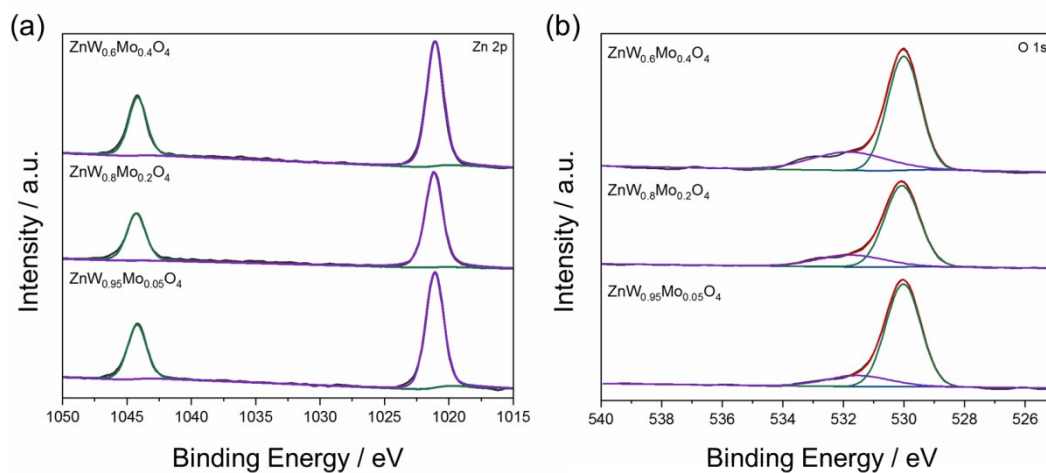

**Fig. S6** XPS of ZnW<sub>1-x</sub>Mo<sub>x</sub>O<sub>4</sub> (x = 5, 20, 40%) of Zn (a) and O (b).

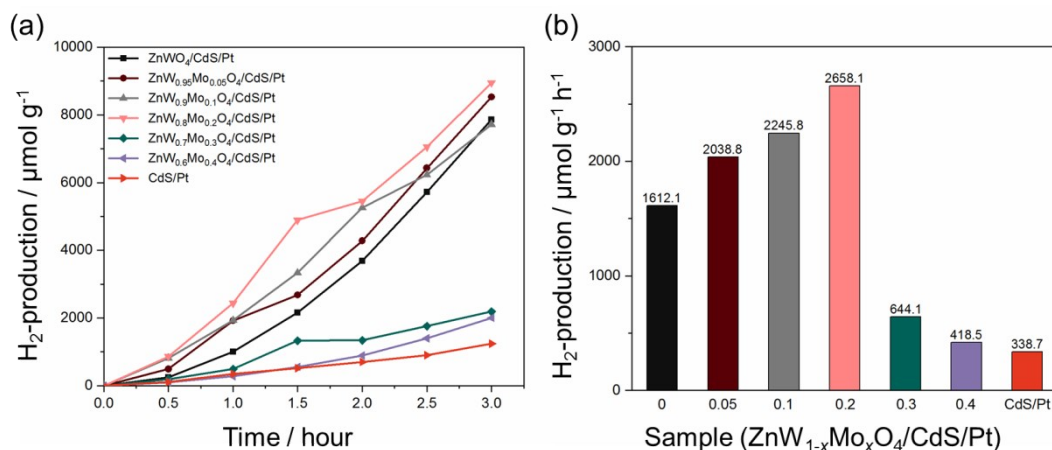

**Fig. S7** (a) Hydrogen evolution in 3 hours of ZnW<sub>1-x</sub>Mo<sub>x</sub>O<sub>4</sub>/CdS/Pt. (b) HER activity of ZnW<sub>1-x</sub>Mo<sub>x</sub>O<sub>4</sub>/CdS/Pt.

**Table S1.** Refined structural parameters and reliability factors for lab XRD data for ZnW<sub>1-x</sub>Mo<sub>x</sub>O<sub>4</sub> ( $x = 0.4$ ) measured at 297 K.

| Atom | Coordinates |         |         | Occupancy | Uiso / Å <sup>2</sup> | site |
|------|-------------|---------|---------|-----------|-----------------------|------|
|      | $x$         | $y$     | $z$     |           |                       |      |
| Zn   | 0.50000     | 0.68330 | 0.25000 | 1.000     | 0.028                 | 2f   |
| W    | 0.00000     | 0.18230 | 0.25000 | 0.595     | 0.011 <sup>[a]</sup>  | 2e   |
| Mo   | 0.00000     | 0.18230 | 0.25000 | 0.405     | 0.011 <sup>[a]</sup>  | 2e   |
| O1   | 0.25470     | 0.37720 | 0.40050 | 1.000     | 0.054                 | 4g   |
| O2   | 0.21710     | 0.89550 | 0.43600 | 1.000     | 0.031                 | 4g   |

<sup>[a]</sup> Atomic displacement parameters for cations were assumed to be the same.

**Table S2.** Carrier density calculated from Mott-Schottky plots in Figure S5.

| Samples                                             | E <sub>FB</sub><br>(V) | Slope<br>(cm <sup>4</sup> F <sup>-2</sup> V <sup>-1</sup> 10 <sup>-8</sup> ) | Straight Line fit<br>(R <sup>2</sup> ) | N <sub>D</sub><br>(cm <sup>-3</sup> ) |
|-----------------------------------------------------|------------------------|------------------------------------------------------------------------------|----------------------------------------|---------------------------------------|
| ZnWO <sub>4</sub>                                   | -0.520                 | 84.31                                                                        | 0.99924                                | 1.0075*10 <sup>19</sup>               |
| ZnW <sub>0.9</sub> Mo <sub>0.1</sub> O <sub>4</sub> | -0.622                 | 14.73                                                                        | 0.99526                                | 5.7664*10 <sup>19</sup>               |
| ZnW <sub>0.8</sub> Mo <sub>0.2</sub> O <sub>4</sub> | -0.526                 | 16.61                                                                        | 0.99778                                | 5.1138*10 <sup>19</sup>               |
| ZnW <sub>0.7</sub> Mo <sub>0.3</sub> O <sub>4</sub> | -0.587                 | 19.45                                                                        | 0.99714                                | 4.3671*10 <sup>19</sup>               |
| ZnW <sub>0.6</sub> Mo <sub>0.4</sub> O <sub>4</sub> | -0.680                 | 12.23                                                                        | 0.99868                                | 6.9452*10 <sup>19</sup>               |
| ZnW <sub>0.4</sub> Mo <sub>0.6</sub> O <sub>4</sub> | -0.651                 | 14.90                                                                        | 0.99526                                | 5.7007*10 <sup>19</sup>               |
| ZnW <sub>0.2</sub> Mo <sub>0.8</sub> O <sub>4</sub> | -0.683                 | 15.06                                                                        | 0.99569                                | 5.6401*10 <sup>19</sup>               |

## Supporting Information (SI)

**Table S3.** Binding Energies for Mo3d and W4d Core Lines of the Products.

| Binding Energy(eV)                                    | W 5p <sub>3/2</sub> | W 4f <sub>5/2</sub> | W 4f <sub>7/2</sub> | Mo <sup>6+</sup> 3d <sub>3/2</sub> | Mo <sup>5+</sup> 3d <sub>3/2</sub> | Mo <sup>6+</sup> 3d <sub>5/2</sub> | Mo <sup>5+</sup> 3d <sub>5/2</sub> |
|-------------------------------------------------------|---------------------|---------------------|---------------------|------------------------------------|------------------------------------|------------------------------------|------------------------------------|
| ZnW <sub>0.95</sub> Mo <sub>0.05</sub> O <sub>4</sub> | 40.87               | 37.27               | 35.12               | 235.44                             | 234.14                             | 232.29                             | 230.99                             |
| ZnW <sub>0.8</sub> Mo <sub>0.2</sub> O <sub>4</sub>   | 41.01               | 37.39               | 35.24               | 235.49                             | 234.19                             | 232.34                             | 231.04                             |
| ZnW <sub>0.6</sub> Mo <sub>0.4</sub> O <sub>4</sub>   | 40.82               | 37.35               | 35.20               | 235.43                             | 234.13                             | 232.28                             | 230.98                             |

**Table S4.** Calculated surface area from BET test.

| Samples                                                  | BET surface area (m <sup>2</sup> /g) | Mean pore width (nm) | Pore volume (cm <sup>3</sup> /g) |
|----------------------------------------------------------|--------------------------------------|----------------------|----------------------------------|
| ZnWO <sub>4</sub>                                        | 22.4325                              | 17.9857              | 0.0964                           |
| ZnW <sub>0.9</sub> Mo <sub>0.1</sub> O <sub>4</sub>      | 24.0332                              | 17.7196              | 0.1521                           |
| ZnW <sub>0.8</sub> Mo <sub>0.2</sub> O <sub>4</sub>      | 27.7555                              | 16.0345              | 0.1897                           |
| ZnW <sub>0.6</sub> Mo <sub>0.4</sub> O <sub>4</sub>      | 28.0925                              | 14.0462              | 0.1070                           |
| ZnW <sub>0.4</sub> Mo <sub>0.6</sub> O <sub>4</sub>      | 27.0959                              | 15.8311              | 0.1496                           |
| ZnWO <sub>4</sub> /CdS                                   | 27.8417                              | 13.5459              | 0.1031                           |
| ZnW <sub>0.8</sub> Mo <sub>0.2</sub> O <sub>4</sub> /CdS | 31.3771                              | 17.8342              | 0.2085                           |
| ZnW <sub>0.6</sub> Mo <sub>0.4</sub> O <sub>4</sub> /CdS | 33.7774                              | 13.9542              | 0.1424                           |

**Table S5.** Parameters (elements) of the EIS fitting using Rs-Rct | CPE equivalent circuit.

| Samples                                                  | R <sub>s</sub> (Ω) | R <sub>ct</sub> (kΩ) |
|----------------------------------------------------------|--------------------|----------------------|
| ZnWO <sub>4</sub>                                        | 19.78              | 4.73*10 <sup>4</sup> |
| ZnW <sub>0.95</sub> Mo <sub>0.05</sub> O <sub>4</sub>    | 17.35              | 412.64               |
| ZnW <sub>0.9</sub> Mo <sub>0.1</sub> O <sub>4</sub>      | 16.10              | 159.41               |
| ZnW <sub>0.8</sub> Mo <sub>0.2</sub> O <sub>4</sub>      | 20.3               | 2.02*10 <sup>3</sup> |
| ZnW <sub>0.7</sub> Mo <sub>0.3</sub> O <sub>4</sub>      | 16.86              | 276.07               |
| ZnW <sub>0.6</sub> Mo <sub>0.4</sub> O <sub>4</sub>      | 13.18              | 67.015               |
| ZnWO <sub>4</sub> /CdS                                   | 27.97              | 42.25                |
| ZnW <sub>0.9</sub> Mo <sub>0.1</sub> O <sub>4</sub> /CdS | 14.51              | 43.328               |
| ZnW <sub>0.8</sub> Mo <sub>0.2</sub> O <sub>4</sub> /CdS | 32.62              | 41.201               |
| ZnW <sub>0.6</sub> Mo <sub>0.4</sub> O <sub>4</sub> /CdS | 17.78              | 42.547               |
